# Supplementary material
Source: PubMed Central journal article supplement (PMC11159872)
Supplement: CAS-100-1923-s001.pdf [file CAS-100-1923-s001.pdf]

Supplementary Table 1  
 PCR primer sequences for upregulated genes detected by SSH analysis

| Primer name               | Sequence                      |
|---------------------------|-------------------------------|
| DKK4 sense                | 5'GGGCTGGAGTGCAATGGTGGCGATC3' |
| DKK4 antisense            | 5'TAAAATCAAATCTTGTAGCAAGTG3'  |
| TOG sense                 | 5'TAAGAATCCCAAGATCATAGTGG3'   |
| TOG antisense             | 5'ATAAGCATCTATTTGTGGCACCT3'   |
| BUB1 sense                | 5'CTGTACATTGCCTGGGCGGGGCA3'   |
| BUB1 antisense            | 5'ACCTGCTCAACATCAACTTTGGA3'   |
| COBW sense                | 5'TTGGTCCCAGCGGTTTCAGCTGAGG3' |
| COBW antisense            | 5'CGGCCGAGGTACACAGTAAACACA3'  |
| GABA-A receptor sense     | 5'CTTTGTGTTTGGGGCCTTGCTAGA3'  |
| GABA-A receptor antisense | 5'TGCAAGAAATTTAACATTGACTCA3'  |
| CEA sense                 | 5'ACTCTTGGTTTGTCAATGGGACT3'   |
| CEA antisense             | 5'AGGATGACTGGGTCGCTGTGGTC3'   |
| NCA sense                 | 5'GGCGAAAGAGTGGATGGCAACAG3'   |
| NCA antisense             | 5'GTAGAGTGAGGGTCATGTTGCCA3'   |
| Maspin sense              | 5'CTTGGAGAAGATTGAAAAACAAC3'   |
| Maspin antisense          | 5'CGGCATCCACAGAAAAGTCAGGG3'   |
